# Supplementary material for: Localized surface plasmon resonance in deep ultraviolet region below 200 nm using a nanohemisphere on mirror structure
Source: PubMed Central journal article supplement (PMC7933189; doi:10.1038/s41598-021-84550-w), 2021-03-04

# Supplementary Material

## Localized surface plasmon resonance in deep ultraviolet region below 200 nm using a nanohemisphere on mirror structure

Kohei Shimano, Soshi Endo, Tetsuya Matsuyama, Kenji Wada, and Koichi Okamoto <sup>a)</sup>

Department of Physics and Electronics, Osaka Prefecture University, 1-1 Gakuen-cho, Naka-ku, Sakai-shi, Osaka 599-8531, Japan

Fig. S1 Long branch of extinction spectra of Al NHoM structure calculated using Al nanohemisphere with diameter of 100 nm. The Al<sub>2</sub>O<sub>3</sub> spacer layer thickness ranged from 9 to 18 nm.

Fig. S2 Experimental extinction spectra of 5 and 10 nm Al after annealing and 10 nm Al before annealing.

---

a) [okamot@pe.osakafu-u.ac.jp](mailto:okamot@pe.osakafu-u.ac.jp)

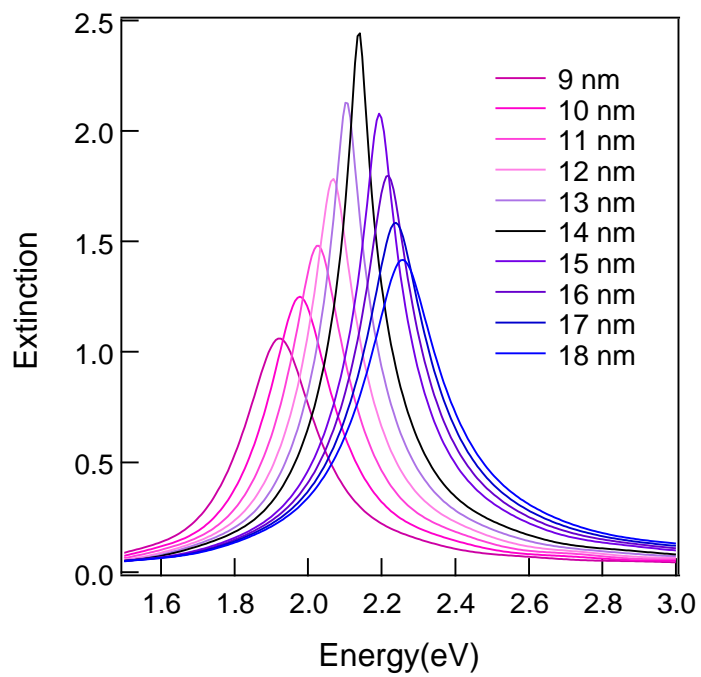

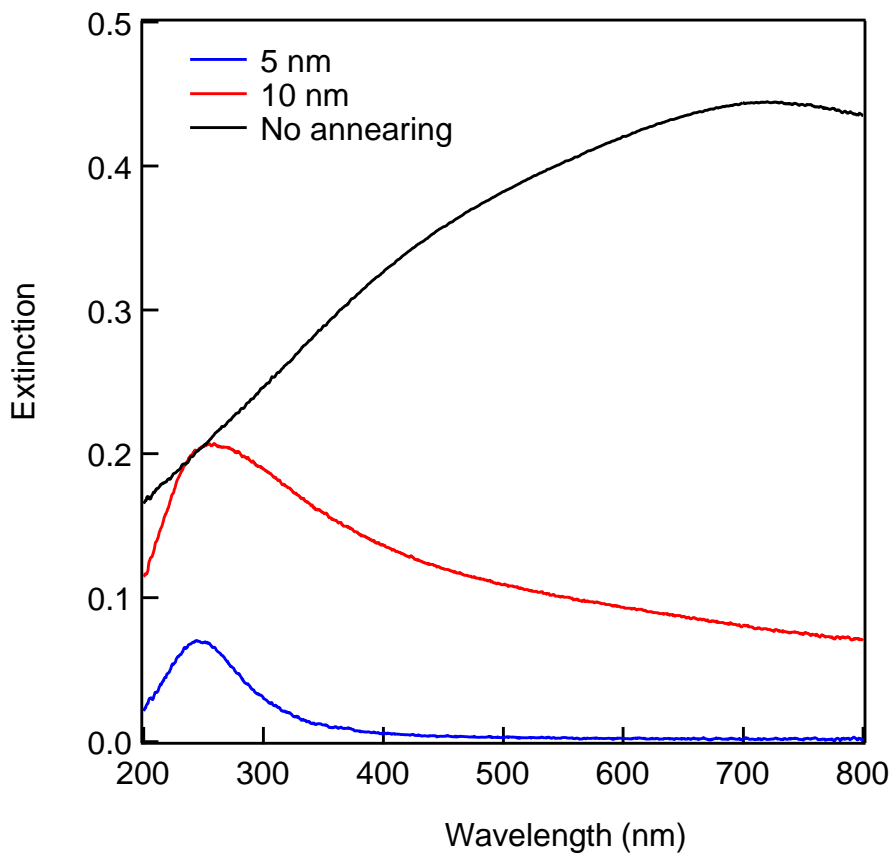

Supplement: 41598_2021_84550_MOESM1_ESM.pdf [file 41598_2021_84550_MOESM1_ESM.pdf]
